# Supplementary material for: Double network hydrogels encapsulating genetically modified dedifferentiated chondrocytes for auricular cartilage regeneration
Source: Royal Society of Chemistry journal article supplement (doi:10.1039/d4tb02352h), 2024-12-20
Supplement: d4tb02352h1.pdf [file d4tb02352h1.pdf]

## Double Network Hydrogels Encapsulating Genetically Modified Dedifferentiated Chondrocytes for Auricular Cartilage Regeneration

Yang Liu<sup>a</sup>, Xiaoting Chen<sup>b</sup>, Xueqin Tan<sup>a</sup>, Yeqian Huang<sup>a</sup>, Wen Zhang<sup>c</sup>, Zhicun Wang<sup>c</sup>, Li Yang<sup>c</sup>, Yunbing Wang<sup>c,\*</sup>, Zhengyong Li<sup>a,\*</sup> and Xingdong Zhang<sup>c</sup>

<sup>a</sup> Department of Plastic and Burn Surgery, West China Hospital, Sichuan University, Chengdu 610041, China.

<sup>b</sup> Animal Experimental Center, West China Hospital, Sichuan University, Chengdu 610041, China.

<sup>c</sup> National Engineering Research Center for Biomaterials, Sichuan University, Chengdu 610064, China.

Corresponding authors:

Yunbing Wang, National Engineering Research Center for Biomaterials, Sichuan University, Chengdu 610064, China. E-mail: yunbing.wang@scu.edu.cn.

Zhengyong Li, Department of Plastic and Burn Surgery, West China Hospital, Sichuan University, Chengdu 610041, China. E-mail: lizydd@wchscu.edu.cn.

### Supporting Figures

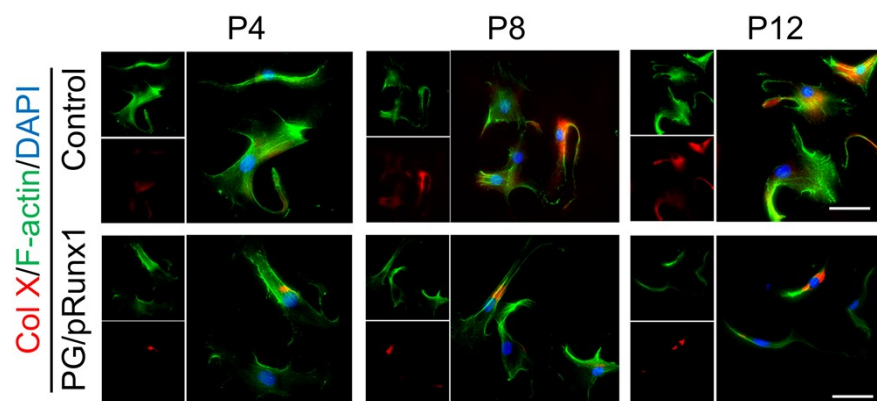

**Fig. S1.** Immunofluorescence staining of hypertrophic chondrocyte markers (Col X) was performed in chondrocytes at different passage numbers with or without PG/pRunx1 nanoparticles treatment. Scale

bars=50  $\mu\text{m}$ .

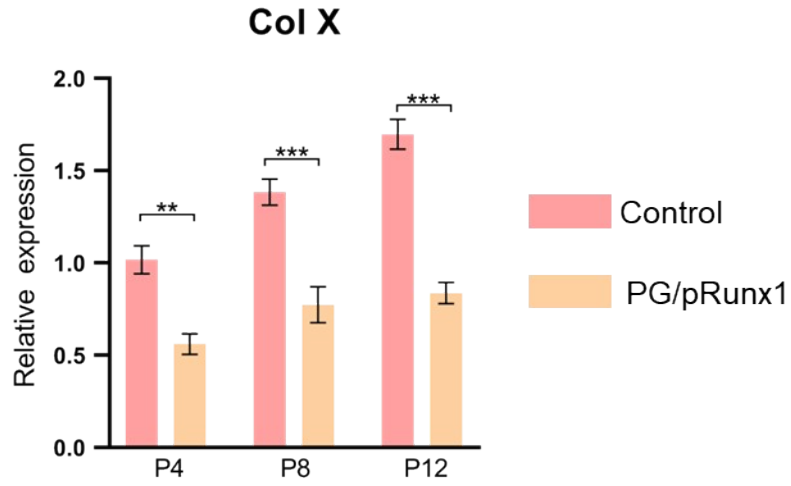

**Fig. S2.** RT-qPCR detection of hypertrophic chondrocyte markers (Col X) in chondrocytes at different passage numbers with or without PG/pRunx1 nanoparticles treatment.

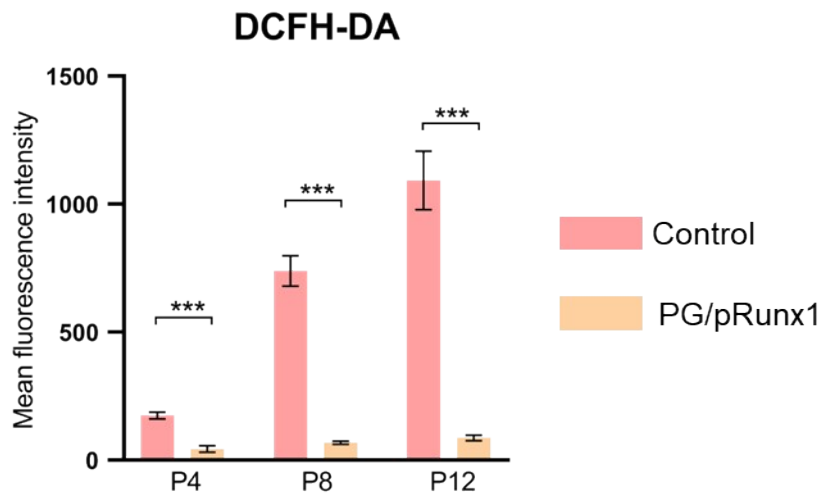

**Fig. S3.** Quantitative analysis of mean DCF fluorescence intensity in chondrocytes at different passage numbers with or without PG/pRunx1 nanoparticles treatment.

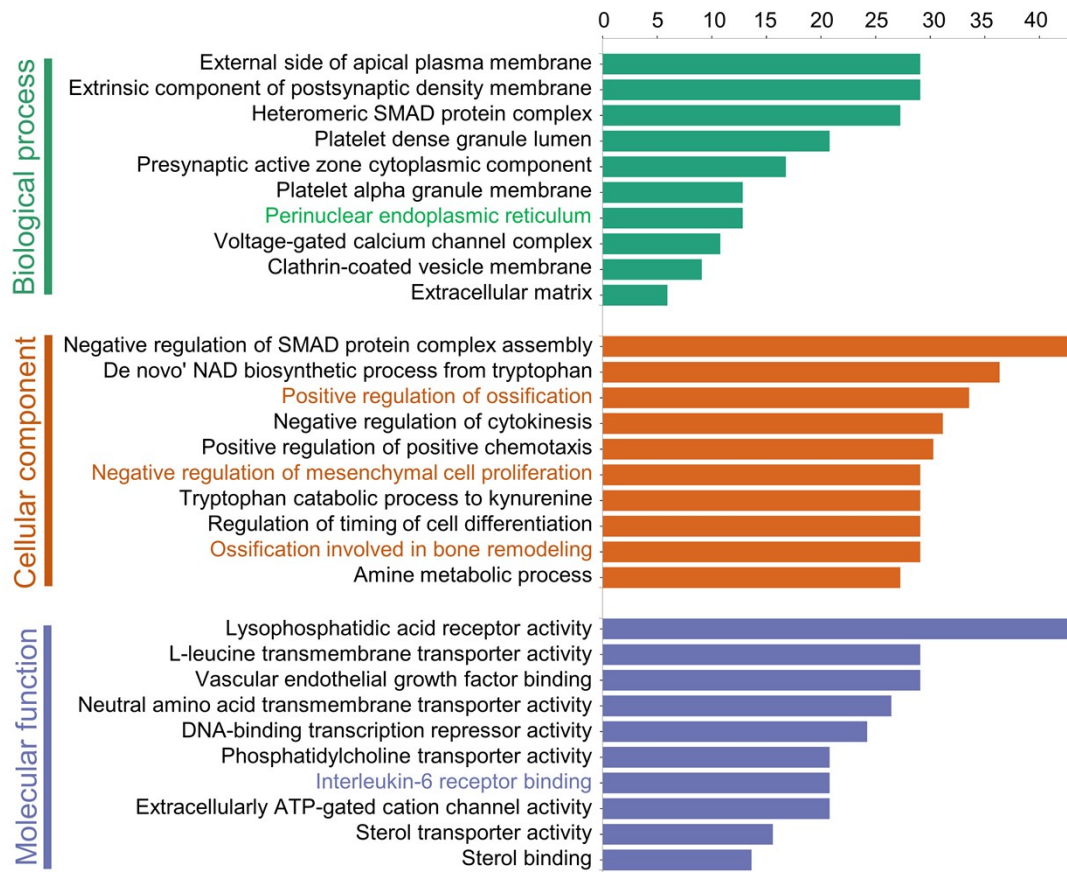

**Fig. S4.** The top 30 GO terms of the downregulated genes related to ER stress and cartilage regeneration in chondrocytes versus chondrocytes treated PG/pRunx1 nanoparticles.

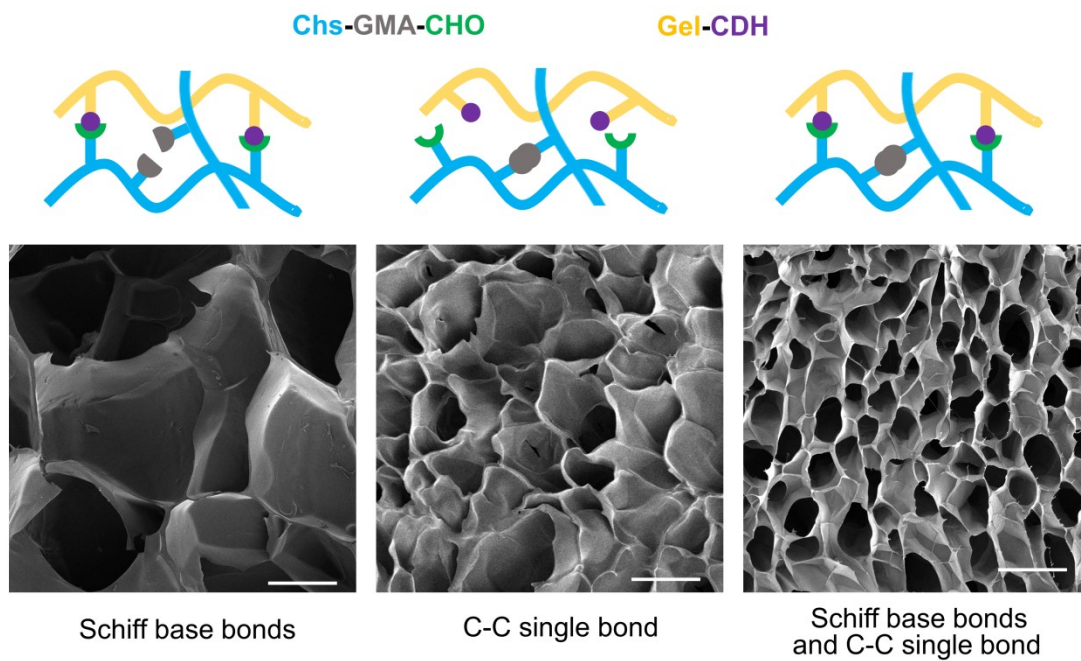

**Fig. S5.** The scanning electron microscopy (SEM) images displayed the different crosslinked hydrogels based on Chs-GMA-CHO and Gel-CDH. Scale bars=100  $\mu$ m.

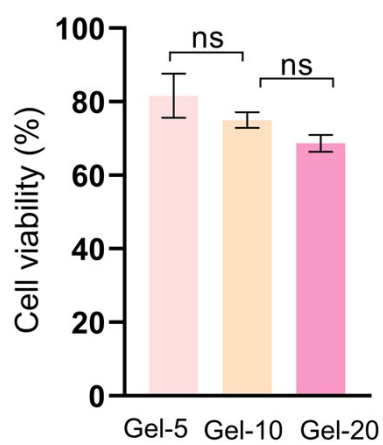

**Fig. S6.** The cell viability measurement of chondrocytes embedded in the different crosslinked hydrogels by CCK-8.

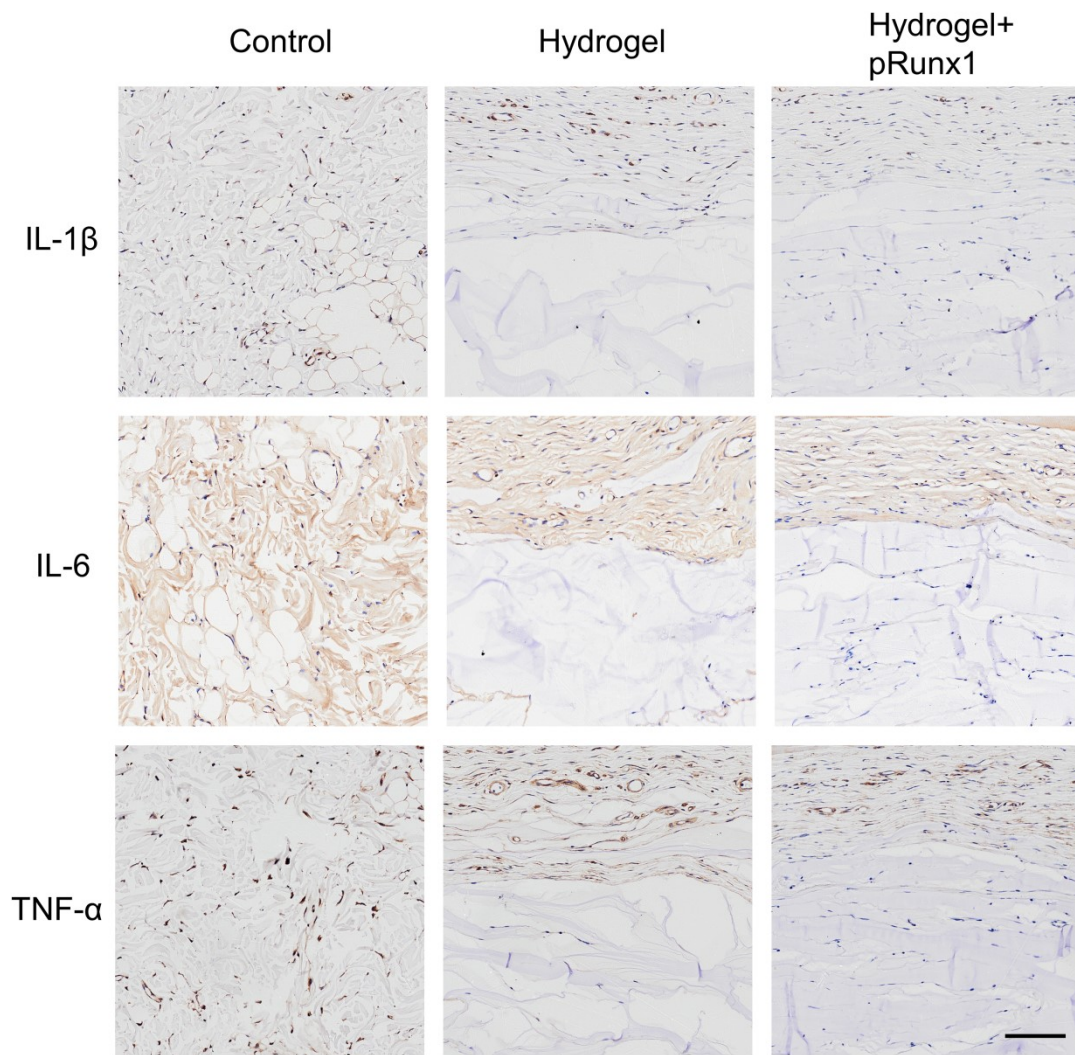

**Fig. S7.** Representative immunohistochemistry images of IL-1 $\beta$ , IL-6, and TNF- $\alpha$  in the hypodermis one week after hydrogels implantation. Scale bars= 100  $\mu$ m.



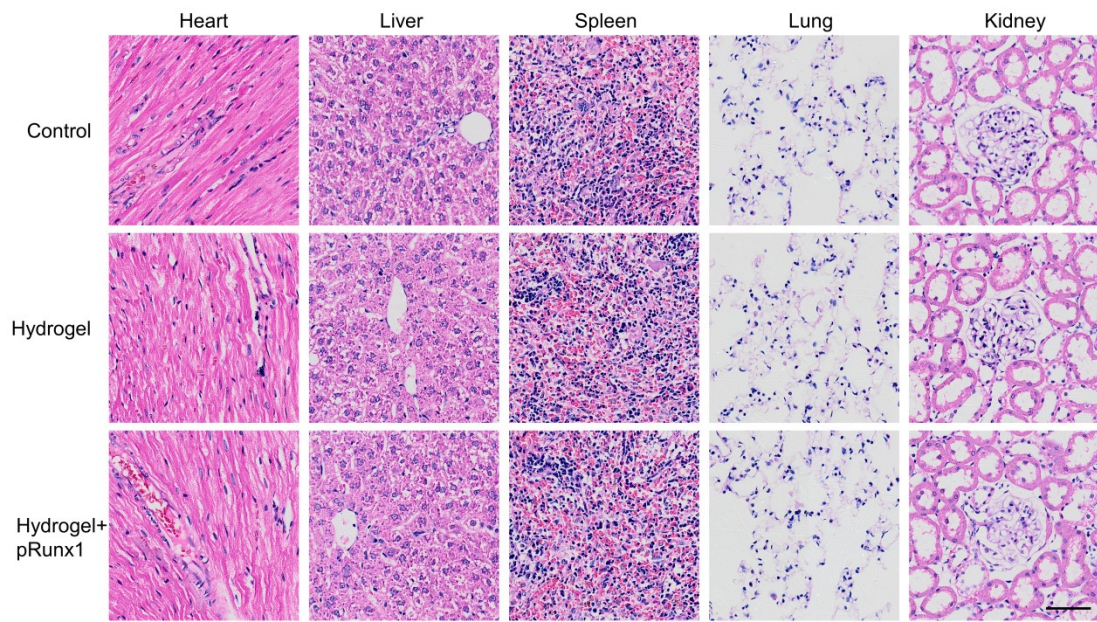

**Fig. S8.** Representative hematoxylin–eosin staining of the major organs (heart, liver, spleen, lung and kidney) of rats 1 weeks after subcutaneous implantation. Scale bars=50  $\mu$ m.

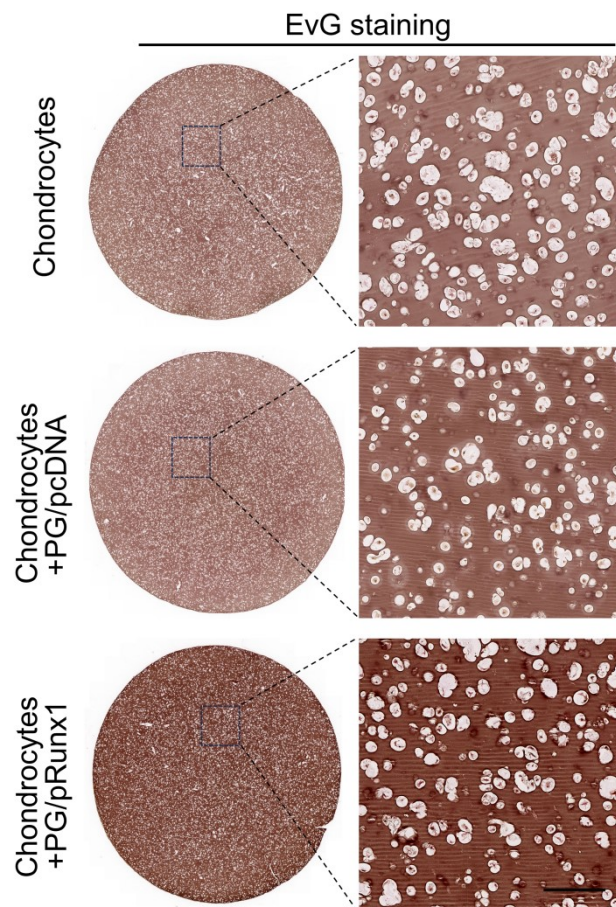

**Fig. S9.** The elastin in chondrocyte-encapsulated hydrogel disks were investigated with EvG staining, scale bars=200  $\mu\text{m}$ .

**Table S1.** Primers for qRT-PCR.

| Genes        | Forward primer              | Reverse primer             |
|--------------|-----------------------------|----------------------------|
| GAPDH        | 5-CGTCAAAGGTGGAGGAGTG-3     | 5-GAAGCTCACTGGCATGGC-3     |
| Collagen 2A1 | 5-AGGTCACAGAGGTTATCCAG-3    | 5-GTCCGTCCTCTTTCACCAG-3    |
| Aggrecan     | 5-TAAATACGGTGCTGCTGGC-3     | 5-TGGTGTGAGGACGTATGGC-3    |
| SOX9         | 5-TCTGGAGACTTCTGAACGAGAGC-3 | 5-TGTAATCCGGGTGGTCCTTC-3   |
| MMP13        | 5-CCTTCAAAGTTTGGTCCGATG-3   | 5-TCAAATGGGTAGAAGTCGCC-3   |
| Collagen X   | 5-AGGAATGCCTGTGTCTGCTT-3    | 5-ACAGGCCTACCCAAACATGA-3   |
| ATF4         | 5-ATGGATTTGAAGGAGTTCGACT-3  | 5-AGAGATCACAAGTGTCCATCAA-3 |
| Runx1        | 5-GTGGTCCTACGATCAGTCCT-3    | 5-GTTCTGCAGAGAGGGTTGTC-3   |

**Table S2.** Composition of hydrogels.

| Sample               | Chs-GMA-CHO (mg) | Gel-CDH (mg) | PEO (mg) | LAP (mg) | PBS (mL) |
|----------------------|------------------|--------------|----------|----------|----------|
| Hydrogel-5 (Gel-5)   | 250              | 750          | 50       | 12.5     | 5        |
| Hydrogel-10 (Gel-10) | 500              | 750          | 50       | 12.5     | 5        |
| Hydrogel-20 (Gel-20) | 1000             | 750          | 50       | 12.5     | 5        |
